# Supplementary material
Source: PubMed Central journal article supplement (PMC2738252)
Supplement: supp_83_18_9512__1.pdf [file supp_83_18_9512__1.pdf]

Supplementary Table: Background sequences of the 69 sets. This overview contains all mutations that were not changed within the given set, hence might include PI-RAMs.

| Set Nr | Background Mutations                                                                                                                    |
|--------|-----------------------------------------------------------------------------------------------------------------------------------------|
| 1      | V3I, L10V, I13V, G16A, K20R, V32A, L33F, E35D, M36I, S37E, M46I, K55R, Q58E, D60E, Q61E, I62V, L63P, V82A, L89M, L90M, I93L             |
| 2      | V3I, L10I, I13V, K20R, V32I, E35D, M36I, S37E, K43Q, M46L, K55R, L63P, I64L, I66F, A71V, I72V, V82A, I84V, L89V                         |
| 3      | V3I, L10I, I13V, I15V, E21Q, L33F, E35D, M36I, S37D, R41K, I54M, I62V, L63P, A71V, T74E, P79A, I84V, I85V, L89V, L90M, I93L             |
| 4      | V3I, L10V, G16A, S37K, R41K, M46I, I47V, G48M, Q61D, L63P, I72V, T74S, L76V, V77I, V82C, I93L                                           |
| 5      | V3I, G16A, S37K, R41K, M46I, I47V, G48M, I54M, Q61D, L63P, I72V, T74S, V77I, V82C, I93L                                                 |
| 6      | V3I, L10I, I13V, G16E, E34Q, S37N, M46I, I54M, Q61N, I62V, L63T, I64V, T74S, I84V                                                       |
| 7      | V3I, I13V, G16E, V32I, L33F, S37N, M46I, I47V, I54L, L63T, I72V                                                                         |
| 8      | V3I, L10I, V11I, I13V, G16A, L33F, E34Q, M46I, K55R, L63P, G73T, V77I, I84V, L89S, L90M, I93L                                           |
| 9      | V3I, L10F, G16A, L33F, E34Q, S37N, R41K, G51A, L63P, G73T, P79D, I84V, L89V, L90M, I93L                                                 |
| 10     | V3I, L10I, T12K, I13V, K14R, L19I, L33F, S37N, R41K, I54L, I62V, L63Q, A71V, G73S, I84V, L89T, L90M, Q92K                               |
| 11     | V3I, L10F, T12E, L19I, S37N, M46I, K55R, Q61N, I62V, L63P, I66V, T74S, I84V, I85V, L90M, T91S                                           |
| 12     | V3I, L10F, V11I, I13V, L33F, E35N, M36I, S37D, K55R, I62V, L63P, A71V, T74P, I84V, L90M, T91S                                           |
| 13     | V3I, L10V, I13V, V32I, S37N, M46I, I47V, K55R, I62V, L63P, I64L, A71I, I72L, P79A, L89S                                                 |
| 14     | V3I, T4S, L10V, V11I, I15V, L19P, K20I, A22V, E35G, M36I, S37N, K45R, I54V, I62V, L63P, C67F, G68E, A71V, I72L, N83S, I84V, I85V        |
| 15     | V3I, L10V, V11I, I13V, L33F, E34Q, S37D, M46L, G48V, Q58E, D60N, I62V, L63P, A71V, V82A, I84V, I93L                                     |
| 16     | V3I, L10I, K20R, E34N, E35D, M36I, S37N, R41K, K43T, G48V, I50V, I54T, Q61E, I62V, L63A, I64L, A71V, I72T, T74S, V82A, L89M, I93L       |
| 17     | V3I, L10F, I15V, V32I, S37N, M46I, I47V, K55R, L63P, V82A, L89V, I93L                                                                   |
| 18     | V3I, L10I, I13V, S37N, M46I, I54M, Q61N, I62V, L63T, I64V, T74S, I84V                                                                   |
| 19     | V3I, L10F, T12A, I15V, L19P, K20I, E34Q, S37Y, R41K, M46I, K55R, I62V, L63P, I72T, G73T, V77I, I84V, I85V, I93L                         |
| 20     | V3I, L10F, V11I, L19I, V32I, L33F, M36L, S37N, K43T, M46I, I47V, I62V, L63P, I72L, V82A                                                 |
| 21     | V3I, L10I, I13V, I15V, L24I, L33F, M36I, S37N, R41K, M46I, I54M, K55R, L63P, K70R, I72V, T74S, I84V, L89M                               |
| 22     | V3I, L10I, I13V, G16E, V32I, E34Q, S37N, M46I, I47V, I54M, Q61N, L63T, I64V, T74S                                                       |
| 23     | V3I, L10F, V11I, I13V, G16A, L33F, E35N, M36I, S37D, K55R, I62V, L63P, A71V, T74P, I84V, L90M, T91S                                     |
| 24     | V3I, L10F, V11I, I13V, I15V, L24I, L33F, E35D, M36I, S37N, R41K, M46I, K55R, L63P, K70R, I72V, T74S, I84V, L89M                         |
| 25     | V3I, L10I, V11L, I13V, I15V, L19W, K20V, L33F, E35N, S37N, R41K, K43Q, K45R, I54L, R57K, I62V, L63P, K70E, A71V, G73S, I84V, L89V, L90M |
| 26     | V3I, L10F, T12E, L19I, M36I, S37N, M46I, K55R, Q61N, I62V, L63P, I66V, G73C, T74S, I84V, I85V, L90M, T91S                               |
| 27     | V3I, L10I, T12P, I13V, I15V, K20I, M36I, S37N, M46I, F53Y, I62V, L63P, C67F, I72L, G73C, P79A, I84V, L90M                               |
| 28     | V3I, L10F, V11I, I13V, K20V, L33F, S37N, D60E, L63P, A71I, I72L, P79A, I84V, L89V,                                                      |

|    |                                                                                                                                         |
|----|-----------------------------------------------------------------------------------------------------------------------------------------|
|    | T91S, Q92K                                                                                                                              |
| 29 | V3I, L10F, I13V, I15V, K20V, V32I, M36I, S37N, I47V, Q58E, L63P, A71I, I72V, V82A, L89V                                                 |
| 30 | V3I, L10I, I15V, G16E, L19I, K20R, E35D, M36I, S37N, M46I, I50V, F53L, Q61H, L63T, E65D, A71V, I72T, L89M                               |
| 31 | V3I, L10F, V11I, T12P, I15V, V32I, L33F, E34Q, S37N, R41K, I47V, I54M, K55R, I62V, L63P, C67E, A71I, I72V, G73D, V77I, N83D, Q92K, I93L |
| 32 | V3I, L10I, V32I, S37N, L38W, K43T, M46I, I47V, I54M, I62V, L63P, A71L, I85V, L89V, L90M, I93L                                           |
| 33 | V3I, L10Y, V11I, T12K, I13V, I15V, S37N, K43T, I54M, D60E, L63P, A71V, G73S, I84V, L90M, Q92R                                           |
| 34 | V3I, L10I, L33F, E34Q, M46I, I54M, I62V, L63P, A71V, V77I, P79S, V82A, I93L                                                             |
| 35 | V3I, L10F, T12E, I13V, K14R, G16A, V32I, L33F, E34Q, S37N, I47V, I54M, L63P, A71M, I72L, V77I, P79S, I93L                               |
| 36 | V3I, L10F, I13V, I15V, K20I, M36I, S37D, M46I, I54V, L63P, T74P, I84V, L89V, T91S, I93L                                                 |
| 37 | V3I, L10I, I13V, L33F, E35D, M36I, S37N, R41K, K43T, I50V, I62V, L63P, A71V, T74P, V82A, L90M, I93L                                     |
| 38 | V3I, L10F, T12Q, I13V, V32I, L33F, S37N, M46I, I47V, Q58E, I62V, L63P, C67F, K70E, G73C, V77I, L90M                                     |
| 39 | V3I, L10I, I13V, G16A, V32I, L33F, M46I, I47V, I54L, L63P, V77I, I84V, L89V, L90M                                                       |
| 40 | V3I, L10I, V11I, I13V, L19I, L33F, S37N, I54L, K55R, Q58E, D60E, Q61E, I62V, L63P, A71V, I72T, G73S, I84V, L90M                         |
| 41 | V3I, L10F, I13A, A22V, E35D, M36I, S37N, R41K, M46I, I47V, R57K, Q61N, I62V, L63P, I64V, A71V, L76V, N83D, T91S                         |
| 42 | V3I, T12S, I15V, L19T, V32I, M36I, S37N, R41K, L63P, H69K, A71V, V82A, I85V, L89V, I93L                                                 |
| 43 | V3I, T4S, L10F, V11L, I15V, M36I, S37D, M46I, I62V, L63P, A71I, I72K, G73T, I84V, I85V, L89V, L90M                                      |
| 44 | V3I, L10I, T12P, L19P, L24I, E35D, M36I, S37N, M46I, I54M, I62V, L63P, I64V, A71V, I72T, T74S, L76V, I93L                               |
| 45 | V3I, L10F, I13V, I15V, K20V, V32I, E35D, M36I, S37N, K43T, I47V, D60E, I62V, L63P, A71I, T74P, L89V, L90M                               |
| 46 | V3I, L10V, V32I, L33F, E34N, E35D, M36I, S37D, I47V, I54M, K55R, R57K, Q58E, I62V, L63P, A71V, T74A, I93L                               |
| 47 | V3I, L10I, T12P, I13V, K14R, L33F, S37N, R41K, M46I, R57K, L63P, V77I, V82I, I84V, L90M, I93L                                           |
| 48 | V3I, L10F, V11I, I13V, I15V, Q18H, V32I, L33F, E34Q, S37E, K43R, I47V, I54M, R57K, I62V, L63P, V77I, L89V                               |
| 49 | V3I, T12I, I13V, L33F, S37N, P39Q, R41K, M46I, I54M, K55R, I62V, L63P, A71V, T74S, L76V, V77I, I93L                                     |
| 50 | V3I, L10F, I13V, K20I, M36I, S37N, M46I, K55R, D60E, I62V, L63P, I64V, I84V, T91S                                                       |
| 51 | V3I, L10V, I13V, I15V, V32I, L33F, M36I, S37N, I47V, I54M, Q58E, D60E, Q61E, L63P, I64V, H69Y, A71V, I93L                               |
| 52 | V3I, L10I, I13V, K14R, I15V, E35N, M36I, S37D, M46I, I54V, R57K, Q58E, D60Q, L63P, H69K, T74A, L76V, V82I, I84V, L89M                   |
| 53 | V3I, L10F, I15V, G16A, L19I, K20I, E34Q, M36I, S37N, R41K, G51A, L63P, A71I, I72V, G73T, P79D, I84V, I85V, L90M, Q92R, I93L             |
| 54 | V3I, L10I, I13V, K20T, L33F, S37N, I54M, L63P, I64V, I66F, A71V, I72M, V77I, I84V, L90M                                                 |
| 55 | V3I, L10F, T12E, L19I, V32I, L33F, M36I, S37N, I54L, K55R, Q61N, I62V, L63P, I66V, T74S, I84V, I85V, L89V, L90M, T91S                   |
| 56 | V3I, L10I, I15V, K20R, V32I, L33F, E34Q, E35D, M36I, S37N, K43T, M46I, I47V, R57K, I62V, L63P, A71V, V82A, L90M                         |

|    |                                                                                                                                   |
|----|-----------------------------------------------------------------------------------------------------------------------------------|
| 57 | V3I, L10I, T12K, I13V, K14R, L19I, V32I, L33F, E34Q, S37N, R41K, M46I, I54L, I62V, L63Q, I64L, I66F, V77I, I84V, L89T, L90M, Q92K |
| 58 | V3I, I13V, L19I, V32I, L33F, M36A, S37N, P39S, M46I, I47V, K55R, Q58E, I62V, L63P, A71V, G73S, V77I, V82A, L90M, I93L, C95F       |
| 59 | V3I, L10I, G16E, L33F, S37N, M46I, G48Q, Q58E, L63H, K70E, A71V, V77I, V82F, I84V, L90M, I93M                                     |
| 60 | V3I, L10V, I13V, I15V, V32I, L33F, S37N, R41K, K43E, K45R, I47V, I54M, D60N, L63P, C67F, A71V, I72K, L89V                         |
| 61 | V3I, T12S, I13V, K14R, Q18H, L33F, E34K, S37N, K45V, K55N, L63P, I64V, V77I, I84V                                                 |
| 62 | V3I, I13V, K20R, L23I, E35D, M36I, S37N, R41K, M46I, I50V, F53L, I54V, K55R, R57K, D60E, Q61N, L63P, A71V, I85V, L89I             |
| 63 | V3I, L10F, V11I, I13V, I15V, V32I, L33F, S37N, I54L, Q58E, I62V, L63P, I84V, L89I, L90M, I93L                                     |
| 64 | V3I, L10I, I13V, G16A, L33F, S37N, K43T, M46L, I54L, D60H, L63P, I66F, I72T, V77I, I84V, L89V, L90M                               |
| 65 | V3I, L10I, I13V, L33F, E35D, S37D, K43T, M46I, I54A, L63P, I66F, A71V, G73S, V82A, L89V, L90M                                     |
| 66 | V3I, L10F, I13V, K20R, A22V, L24M, V32I, L33F, E35N, M36I, S37N, I54L, Q58E, D60E, I62V, L63P, H69K, A71I, N83D, I84V, T91S       |
| 67 | V3I, L10F, V11I, K14R, I15V, E35D, S37N, R41T, K45V, I50V, I62V, I64V, K70E, A71V, V77I, V82A, I85V, L89I, T91S                   |
| 68 | V3I, T12I, I13V, G16A, L33F, S37N, P39Q, R41K, K43T, M46I, I54M, K55R, I62V, L63P, A71V, T74S, L76V, V77I, I93L                   |
| 69 | V3I, L10I, V11I, I13V, L19I, L33F, E34Q, M46L, I54L, Q58E, I62V, L63P, I64M, A71V, G73S, V77I, V82A, L89V, L90M, Q92K, I93L, C95F |
